# Supplementary material
Source: Springer Nature journal article supplement (https://www.springermedizin.de/resource/supplementary/13075_2010_3028_MOESM1_ESM.pdf/9693370)

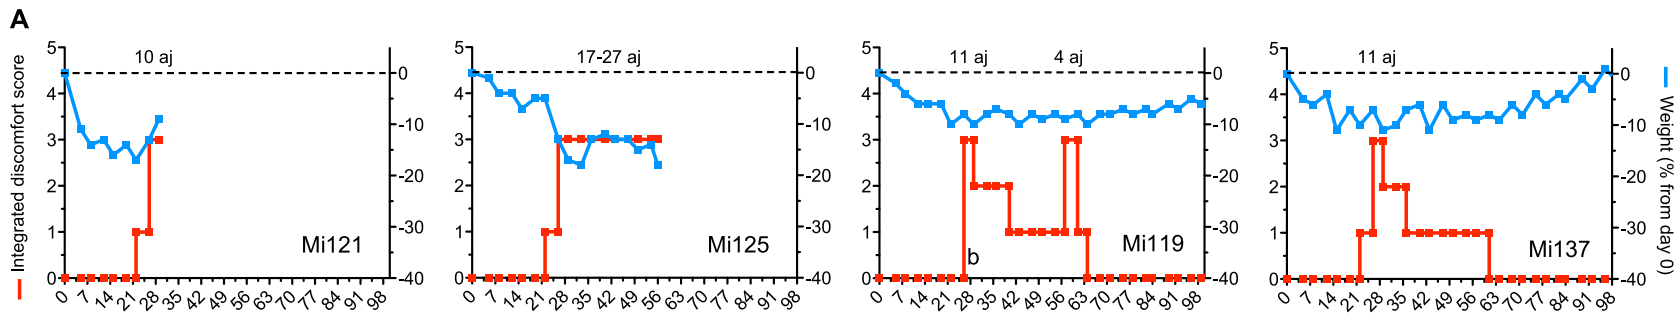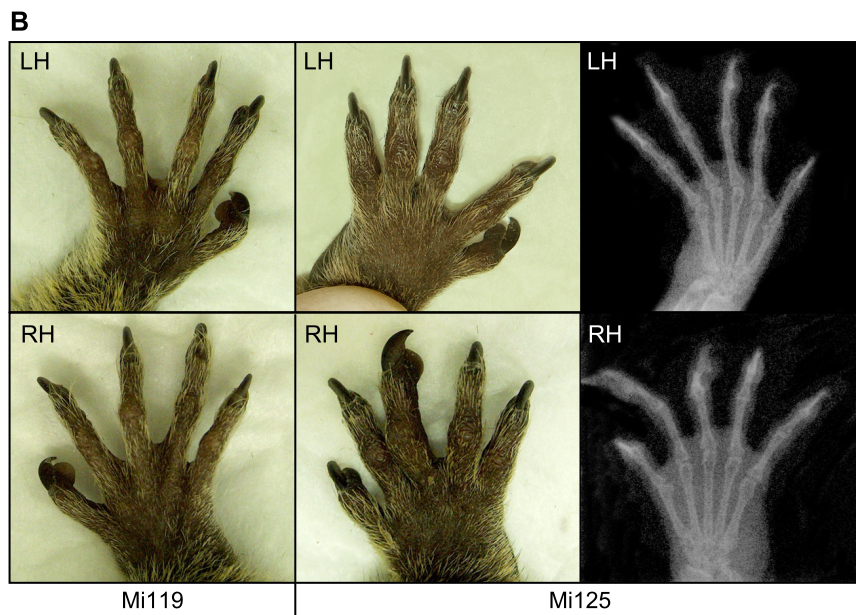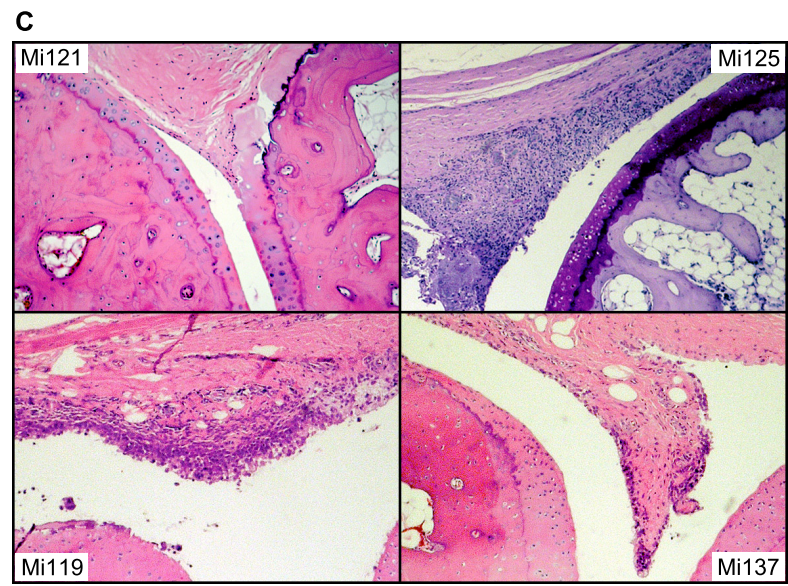

Supplement: MOESM1 [file 9693370]
